# Supplementary material
Source: ML conference proceedings conference paper supplement (https://openaccess.thecvf.com/content/ICCV2025/html/Pan_ICE-Bench_A_Unified_ICCV_2025_paper.html)
Supplement: Supplementary file 1 [file Pan_ICE-Bench_A_Unified_ICCV_2025_supplemental.pdf]

## A. Details on Evaluation Data

Our benchmark comprises a total of 31 tasks, with each task containing between 50 and 500 evaluation cases. We provide visualizations of the conditions and exemplary generation results for each task in Fig. 7. Specifically, an evaluation case should comprise (*Introduction*, *Target Caption*, *Source Image*, *Source Mask*, *Reference Images*) to facilitate the generation and evaluation process. A detailed illustration of a complete evaluation case is presented in Tab. 1. Most of the existing image generation models support only one or a few of the 31 evaluation tasks. We provide a detailed summary of the tasks supported and unsupported by the 10 evaluated models in Tab. 2.

## B. Details on Evaluation Dimensions

### B.1. Aesthetic Quality

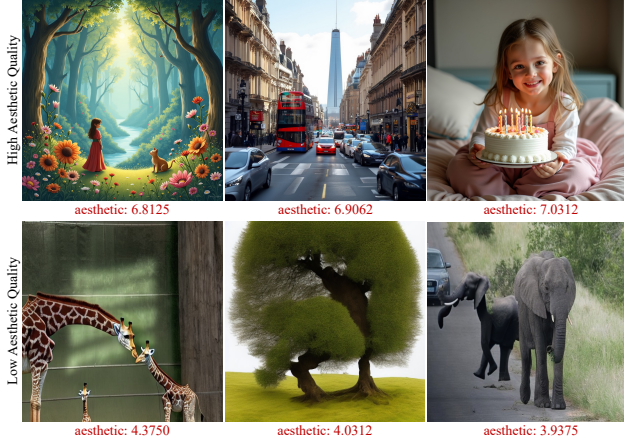

Figure 1. **Visualization of Aesthetic Quality.** Images that receive high aesthetic scores exhibit artistic appeal, whereas those with low aesthetic scores tend to appear unattractive.

Aesthetic Quality evaluates the principles of photographic composition, considering color harmony, subject arrangement, and the overall artistic impression of the image. We utilize a SigLip-based image aesthetic quality predictor to assess the aesthetic score of the generated image. The model produces a rating on a scale from 0 to 10, which we linearly normalize to a range of [0, 1] by dividing the raw score by 10.

$$S_{\text{AES}} = \frac{f_{\text{AES}}(\mathbf{I})}{10} \quad (1)$$

### B.2. Imaging Quality

Imaging quality primarily examines the low-level characteristics of the generated image, such as edge sharpness, distortion, over-exposure, noise, and blur. We employ the MUSIQ image quality predictor trained on the Koniq dataset, as implemented in IQA-Pytorch [10]. For consistency and fairness in comparison, we resize the height of all generated images to 1024 pixels before inputting them into the model to assess imaging quality. This approach inherently favors high-resolution images as they typically

Table 1. **Detail of a complete evaluation case.**

|                                 |                                                                                                                                                                                                      |
|---------------------------------|------------------------------------------------------------------------------------------------------------------------------------------------------------------------------------------------------|
| <b>&lt;ItemID&gt;:</b>          | b9de809c702c8cf23428ec175af3b0b9                                                                                                                                                                     |
| <b>&lt;TaskLevel1&gt;:</b>      | Reference Editing                                                                                                                                                                                    |
| <b>&lt;TaskLevel2&gt;:</b>      | Subject Reference Editing                                                                                                                                                                            |
| <b>&lt;Task&gt;:</b>            | Subject-guided Inpainting                                                                                                                                                                            |
| <b>&lt;SourceImageType&gt;:</b> | Real Image                                                                                                                                                                                           |
| <b>&lt;RegionBased&gt;:</b>     | True                                                                                                                                                                                                 |
| <b>&lt;SourceImage&gt;:</b>     | images/reference_editing/<br>subject_reference_editing/<br>subject_guided_inpainting/<br>b9de809c702c8cf234<br>28ec175af3b0b9_src.png                                                                |
| <b>&lt;SourceMask&gt;:</b>      | images/reference_editing/<br>subject_reference_editing/<br>subject_guided_inpainting/<br>b9de809c702c8cf234<br>28ec175af3b0b9_mask.png                                                               |
| <b>&lt;ReferenceImages&gt;:</b> | ["images/reference_editing/<br>subject_reference_editing/<br>subject_guided_inpainting/<br>b9de809c702c8cf234<br>28ec175af3b0b9_ref1.png"]                                                           |
| <b>&lt;Instruction&gt;:</b>     | Take <REF_1> as a<br>reference to repaint the<br>masked part of <SOURCE>.                                                                                                                            |
| <b>&lt;SourceCaption&gt;:</b>   | Eye-level view of a street<br>scene featuring a fire<br>hydrant in the foreground.                                                                                                                   |
| <b>&lt;TargetCaption&gt;:</b>   | A small, brightly colored toy<br>car sits on a weathered asphalt<br>surface, positioned slightly<br>off-center in the foreground.<br>The car is predominantly red<br>and yellow, with green accents. |

exhibit superior imaging quality compared to low-resolution images. The model produces a score on a scale from 0 to 100, which we linearly normalize to a range of [0, 1] by dividing the raw score by 100.

$$S_{\text{IMG}} = \frac{f_{\text{MUSIQ}}(\mathbf{I})}{100} \quad (2)$$

### B.3. Prompt Following

The prompt-following score evaluates the degree to which the generated image aligns with the provided textual instructions or descriptions. For image creation tasks and controllable generation

Table 2. Task-model correspondence.

| Evaluation Tasks |              |                                | OmniGen [54] | ACE [18] | FLUX [25] | OminiControl [47] | InstructPix2Pix [5] | MagicBrush [57] | UltraEdit [60] | FLUX-Control [48] | IP-Adapter [56] | ACE++ [29] |
|------------------|--------------|--------------------------------|--------------|----------|-----------|-------------------|---------------------|-----------------|----------------|-------------------|-----------------|------------|
| Creating         | No-Ref       | (1) Text-to-Image Creating     | ✓            | ✓        | ✓         | ×                 | ×                   | ×               | ×              | ×                 | ×               | ×          |
|                  | Ref          | (2) Face Reference Creating    | ✓            | ✓        | ×         | ×                 | ×                   | ×               | ×              | ×                 | ✓               | ×          |
|                  |              | (3) Style Reference Creating   | ✓            | ✓        | ×         | ×                 | ×                   | ×               | ×              | ×                 | ✓               | ×          |
|                  |              | (4) Subject Reference Creating | ✓            | ✓        | ×         | ✓                 | ×                   | ×               | ×              | ×                 | ✓               | ×          |
| Editing          | Global       | (5) Color Editing              | ✓            | ✓        | ×         | ×                 | ✓                   | ✓               | ✓              | ×                 | ×               | ×          |
|                  |              | (6) Motion Editing             | ✓            | ✓        | ×         | ×                 | ✓                   | ✓               | ✓              | ×                 | ×               | ×          |
|                  |              | (7) Face Editing               | ✓            | ✓        | ×         | ×                 | ✓                   | ✓               | ✓              | ×                 | ×               | ×          |
|                  |              | (8) Texture Editing            | ✓            | ✓        | ×         | ×                 | ✓                   | ✓               | ✓              | ×                 | ×               | ×          |
|                  |              | (9) Style Editing              | ✓            | ✓        | ×         | ×                 | ✓                   | ✓               | ✓              | ×                 | ×               | ×          |
|                  |              | (10) Scene Editing             | ✓            | ✓        | ×         | ×                 | ✓                   | ✓               | ✓              | ×                 | ×               | ×          |
|                  |              | (11) Subject Addition          | ✓            | ✓        | ×         | ×                 | ✓                   | ✓               | ✓              | ×                 | ×               | ×          |
|                  |              | (12) Subject Removal           | ✓            | ✓        | ×         | ×                 | ✓                   | ✓               | ✓              | ×                 | ×               | ×          |
|                  |              | (13) Subject Change            | ✓            | ✓        | ×         | ×                 | ✓                   | ✓               | ✓              | ×                 | ×               | ×          |
|                  |              | (14) Text Render               | ✓            | ✓        | ×         | ×                 | ✓                   | ✓               | ✓              | ×                 | ×               | ×          |
|                  |              | (15) Text Removal              | ✓            | ✓        | ×         | ×                 | ✓                   | ✓               | ✓              | ×                 | ×               | ×          |
|                  |              | (16) Composite Editing         | ✓            | ✓        | ×         | ×                 | ✓                   | ✓               | ✓              | ×                 | ×               | ×          |
|                  | Local        | (17) Inpainting                | ✓            | ✓        | ×         | ×                 | ×                   | ×               | ✓              | ×                 | ×               | ✓          |
|                  |              | (18) Outpainting               | ✓            | ✓        | ×         | ×                 | ×                   | ×               | ×              | ×                 | ×               | ✓          |
|                  |              | (19) Local Subject Addition    | ✓            | ✓        | ×         | ×                 | ×                   | ×               | ✓              | ×                 | ×               | ✓          |
|                  |              | (20) Local Subject Removal     | ✓            | ✓        | ×         | ×                 | ×                   | ×               | ✓              | ×                 | ×               | ✓          |
|                  |              | (21) Local Text Removal        | ✓            | ✓        | ×         | ×                 | ×                   | ×               | ✓              | ×                 | ×               | ✓          |
|                  |              | (22) Local Text Render         | ✓            | ✓        | ×         | ×                 | ×                   | ×               | ✓              | ×                 | ×               | ✓          |
|                  | Controllable | (23) Pose-guided Generation    | ✓            | ✓        | ×         | ×                 | ×                   | ×               | ×              | ✓                 | ×               | ×          |
|                  |              | (24) Edge-guided Generation    | ✓            | ✓        | ×         | ✓                 | ×                   | ×               | ×              | ✓                 | ×               | ×          |
|                  |              | (25) Depth-guided Generation   | ✓            | ✓        | ×         | ✓                 | ×                   | ×               | ×              | ✓                 | ×               | ×          |
|                  |              | (26) Image Colorization        | ✓            | ✓        | ×         | ✓                 | ×                   | ×               | ×              | ✓                 | ×               | ×          |
|                  |              | (27) Image Deblurring          | ✓            | ✓        | ×         | ✓                 | ×                   | ×               | ×              | ✓                 | ×               | ×          |
|                  | Ref          | (28) Style Transfer            | ✓            | ✓        | ×         | ×                 | ×                   | ×               | ×              | ×                 | ×               | ×          |
|                  |              | (29) Subject-guided Inpainting | ✓            | ✓        | ×         | ×                 | ×                   | ×               | ×              | ×                 | ×               | ✓          |
|                  |              | (30) Virtual Try On            | ✓            | ✓        | ×         | ×                 | ×                   | ×               | ×              | ×                 | ×               | ✓          |
|                  |              | (31) Face Swap                 | ✓            | ✓        | ×         | ×                 | ×                   | ×               | ×              | ×                 | ×               | ✓          |

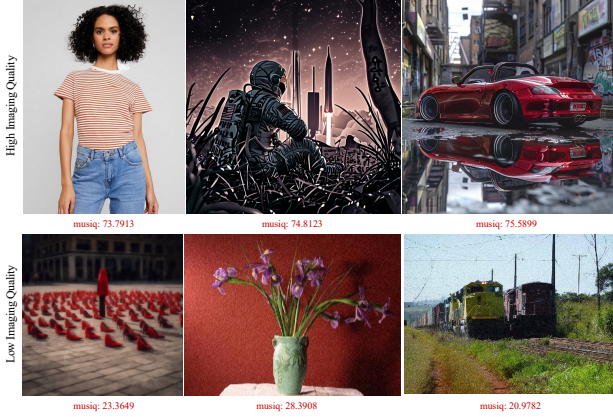Figure 2. **Visualization of Imaging Quality.** Images that achieve high imaging quality scores are typically clear and possess sharp edges, whereas those with low scores tend to appear blurry and noisy.

tasks, we compute the CLIP [36] similarity between the target caption and the generated image directly. The prompt-following score is then obtained by normalizing the CLIP similarity, specifically by dividing it by 0.5.

$$S_{PF} = \frac{\langle d_{\text{prompt}} \cdot d_I \rangle}{0.5} \quad (3)$$

Notably, for the Image Colorization and Image Deblurring tasks, CLIP similarity alone is insufficient to accurately assess prompt-following capability. For the Image Colorization task, the colorfulness score must also be considered an essential metric, leading us to adapt the prompt-following score accordingly:

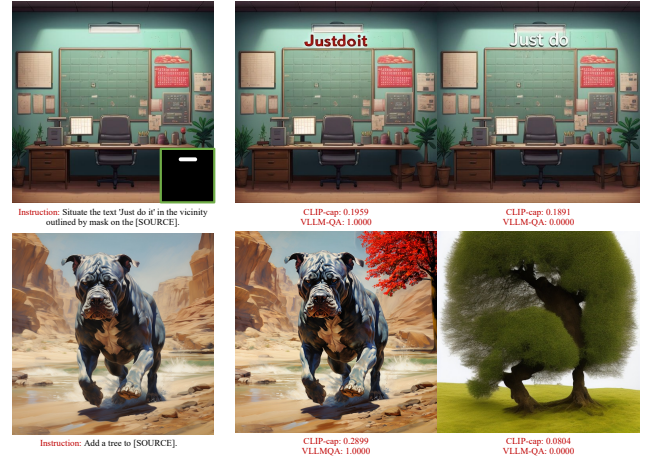Figure 3. **Visualization of Prompt Following.** Both the CLIP-cap and VLLM-QA metrics effectively capture the successful execution of instructions.

$$S_{PF}^{\text{colorsize}} = \frac{\langle d_{\text{prompt}} \cdot d_I \rangle}{0.5} + s_{\text{color}} \quad (4)$$

In the case of the Image Deblurring task, the Imaging score serves as the prompt-following metric, as the primary objective is to enhance image quality.

$$S_{PF}^{\text{deblur}} = S_{\text{IMG}} \quad (5)$$

For image editing tasks, relying solely on CLIP similarity is insufficient to determine whether instructions have been correctly executed. To address this, we introduce a novel VLLM-based metric called VLLM-QA to assess the success of instruction align-

ment. We employ the QWEN2-VL-72B [51] model as our QA tool, prompting it with all relevant input components, including the instruction, source image, reference images, source mask, and the generated image. The model is tasked with evaluating whether the instruction has been accurately implemented; it returns a score of 1 for success and 0 otherwise. We calculate the VLLM-QA score by averaging the results across all cases within a task. Subsequently, the prompt-following score is determined as follows:

$$S_{PF} = \frac{\langle d_{\text{prompt}} \cdot d_I \rangle}{0.5} + f_{QWEN}(\cdot) \quad (6)$$

#### B.4. Source Consistency

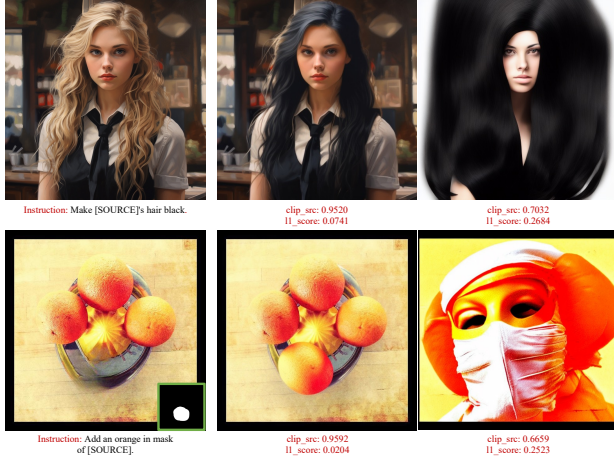

Figure 4. **Visualization of Source Consistency.** Images that exhibit strong pixel alignment with the source image attain higher CLIP-src scores and lower L1 scores. These outcomes underscore the effectiveness of our evaluation of Source Consistency.

For image editing tasks, it is crucial to maintain the pixels that are unrelated to the editing instructions unchanged. To evaluate the models' ability to preserve pixel alignment, we compute both the CLIP similarity and the mean L1 distance between the generated image and the source image. The Source Consistency score is then calculated as follows:

$$S_{SRC} = \frac{\langle d_{I_{src}} \cdot d_I \rangle + 1 - L1(I_{src}, I)}{2} \quad (7)$$

#### B.5. Reference Consistency

Reference consistency evaluates the semantic alignment between the reference image and the generated image across specific aspects, such as face, style, and subject. To achieve this, we utilize different encoders to extract embeddings from both the reference image and the generated image. We then assess the reference consistency in these three dimensions by calculating the feature similarity between the extracted embeddings:

$$S_{REF} = \langle d_{I_{ref}} \cdot d_I \rangle \quad (8)$$

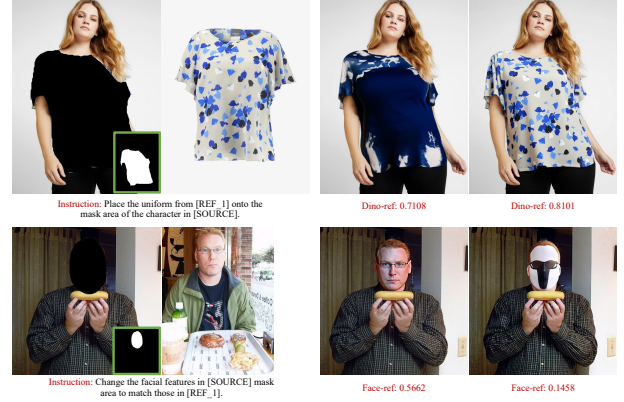

Figure 5. **Visualization of Reference Consistency.** Images that maintain identity preservation with the reference image achieve higher CLIP-ref scores, highlighting the effectiveness of our Reference Consistency evaluation.

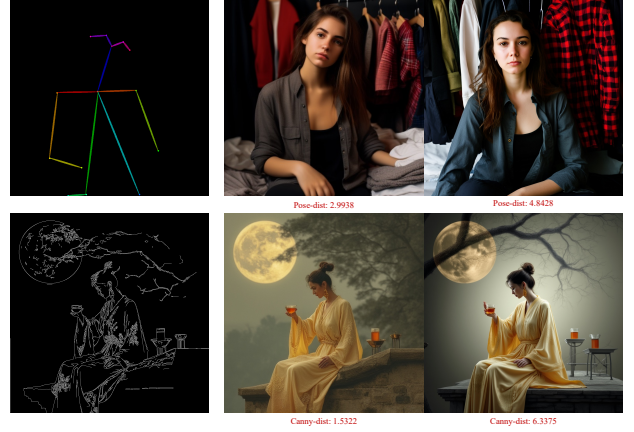

Figure 6. **Visualization of Controllability.** The Pose-dist and Canny-dist metrics effectively indicate controllability, with lower values generally signifying greater controllability.

#### B.6. Controllability

Controllability evaluates the alignment of low-level features in the generated image with the input condition image. For tasks such as Pose, Depth, Edge-guided Generation, and Image Colorization, we extract the relevant low-level feature map from the generated image and calculate the mean L1 score between this feature map and the input condition image. The controllability score is then determined as follows:

$$S_{CTRL} = 1 - (f_{enc}(I) - I_{src}) \quad (9)$$

While for Image Deblurring task, we employ the SSIM score as the controllability score:

$$S_{CTRL}^{deblur} = SSIM(I, I_{src}) \quad (10)$$



## C. Details on Model Performance per Task

In this section, we present the detailed evaluation results for each metric across all tasks and models. The results for No-ref Image Creating are shown in Tab. 3. The results for Ref Image Creating are provided in Tab. 6. For No-ref Image Editing, the results are detailed in Tab. 4, Tab. 7, and Tab. 8. The results for Ref Image Editing are reported in Tab. 5.

Table 3. Metrics on No-ref Image Creating Task (Task 1).

| Models  | Aesthetic Score↑ | Imaging Score↑ | CLIP-cap↑    |
|---------|------------------|----------------|--------------|
| ACE     | 5.485            | 53.403         | 0.283        |
| OmniGen | 6.107            | 72.615         | <b>0.285</b> |
| FLUX    | <b>6.175</b>     | <b>73.480</b>  | <b>0.285</b> |

Table 4. Metrics on Controllable Generation Tasks (Tasks 23-27).

| Models       | Task 23: Pose-guided Generation  |                |              |              |              |
|--------------|----------------------------------|----------------|--------------|--------------|--------------|
|              | Aesthetic Score↑                 | Imaging Score↑ | CLIP-cap↑    | L1-src↓      |              |
| ACE          | <b>5.568</b>                     | 50.253         | <b>0.299</b> | <b>0.009</b> |              |
| OmniGen      | 5.365                            | <b>61.463</b>  | 0.298        | 0.015        |              |
| FLUX-Control | 5.538                            | 56.010         | 0.298        | 0.015        |              |
|              |                                  |                |              |              |              |
| Models       | Task 24: Edge-guided Generation  |                |              |              |              |
|              | Aesthetic Score↑                 | Imaging Score↑ | CLIP-cap↑    | L1-src↓      |              |
| ACE          | 5.319                            | 49.506         | 0.298        | 0.091        |              |
| OmniGen      | 4.897                            | <b>66.168</b>  | 0.293        | 0.102        |              |
| FLUX-Control | 5.493                            | 54.225         | 0.296        | 0.104        |              |
| OminiControl | <b>5.507</b>                     | 51.301         | <b>0.299</b> | <b>0.087</b> |              |
|              |                                  |                |              |              |              |
| Models       | Task 25: Depth-guided Generation |                |              |              |              |
|              | Aesthetic Score↑                 | Imaging Score↑ | CLIP-cap↑    | L1-src↓      |              |
| ACE          | 5.505                            | 51.948         | 0.291        | <b>0.095</b> |              |
| OmniGen      | 4.809                            | <b>60.266</b>  | 0.266        | 0.131        |              |
| FLUX-Control | <b>5.844</b>                     | 59.578         | 0.295        | 0.123        |              |
| OminiControl | 5.762                            | 57.305         | <b>0.296</b> | 0.098        |              |
|              |                                  |                |              |              |              |
| Models       | Task 26: Image Colorization      |                |              |              |              |
|              | Aesthetic Score↑                 | Imaging Score↑ | CLIP-cap↑    | Color Score↑ | L1-src↓      |
| ACE          | 5.325                            | 50.484         | 0.295        | <b>0.278</b> | 0.059        |
| OmniGen      | 5.275                            | <b>61.076</b>  | 0.289        | 0.189        | 0.185        |
| FLUX-Control | <b>5.371</b>                     | 51.891         | <b>0.302</b> | 0.210        | 0.067        |
| OminiControl | 5.272                            | 50.995         | 0.301        | 0.161        | <b>0.029</b> |
|              |                                  |                |              |              |              |
| Models       | Task 27: Image Deblurring        |                |              |              |              |
|              | Aesthetic Score↑                 | Imaging Score↑ | SSIM↑        |              |              |
| ACE          | <b>5.556</b>                     | <b>50.229</b>  | 0.582        |              |              |
| OmniGen      | 5.133                            | 48.144         | 0.350        |              |              |
| FLUX-Control | 5.342                            | 45.063         | 0.540        |              |              |
| OminiControl | 4.249                            | 30.327         | <b>0.650</b> |              |              |

Table 5. Metrics on Ref Image Editing Tasks (Tasks 28-31).

| Task 28: Style Transfer            |                  |                |              |              |              |              |              |
|------------------------------------|------------------|----------------|--------------|--------------|--------------|--------------|--------------|
| Models                             | Aesthetic Score↑ | Imaging Score↑ | CLIP -cap↑   | VLLM -QA↑    | Style -ref↑  | CLIP -src↑   | L1-src↓      |
| ACE                                | <b>5.346</b>     | 53.030         | 0.189        | <b>0.323</b> | 0.234        | <b>0.762</b> | <b>0.186</b> |
| OmniGen                            | 5.045            | <b>62.995</b>  | <b>0.193</b> | 0.290        | <b>0.359</b> | 0.680        | 0.277        |
| Task 29: Subject-guided Inpainting |                  |                |              |              |              |              |              |
| Models                             | Aesthetic Score↑ | Imaging Score↑ | CLIP -cap↑   | VLLM -QA↑    | DINO -ref↑   | CLIP -src↑   | L1-src↓      |
| ACE                                | 4.812            | 52.544         | <b>0.197</b> | 0.171        | 0.562        | <b>0.766</b> | <b>0.015</b> |
| OmniGen                            | 4.459            | 59.995         | 0.186        | 0.093        | 0.555        | 0.642        | 0.149        |
| ACE++                              | <b>4.835</b>     | <b>63.419</b>  | 0.186        | <b>0.257</b> | <b>0.563</b> | 0.753        | 0.040        |
| Task 31: Face Swap                 |                  |                |              |              |              |              |              |
| Models                             | Aesthetic Score↑ | Imaging Score↑ | CLIP -cap↑   | VLLM -QA↑    | Face -ref↑   | CLIP -src↑   | L1-src↓      |
| ACE                                | 4.983            | 56.985         | <b>0.232</b> | 0.400        | 0.250        | <b>0.763</b> | <b>0.018</b> |
| OmniGen                            | 4.309            | 64.021         | 0.217        | <b>0.484</b> | <b>0.477</b> | 0.661        | 0.112        |
| ACE++                              | <b>5.034</b>     | <b>64.963</b>  | 0.231        | 0.442        | 0.378        | 0.760        | 0.054        |
| Task 30: Virtual Try On            |                  |                |              |              |              |              |              |
| Models                             | Aesthetic Score↑ | Imaging Score↑ | CLIP -cap↑   | VLLM -QA↑    | DINO -ref↑   | CLIP -src↑   | L1-src↓      |
| ACE                                | <b>4.837</b>     | 64.723         | 0.231        | 0.629        | 0.751        | <b>0.889</b> | <b>0.006</b> |
| OmniGen                            | 4.696            | 73.313         | 0.235        | 0.722        | 0.744        | 0.847        | 0.058        |
| ACE++                              | 4.577            | <b>73.525</b>  | <b>0.243</b> | <b>0.804</b> | <b>0.763</b> | 0.882        | 0.029        |



Table 6. Metrics on Ref Image Creating Tasks (Tasks 2-4).

| Models       | Task 2: Face Reference Creating |                          |                     |                     | Task 3: Style Reference Creating |                          |                     |                      | Task 4: Subject Reference Creating |                          |                     |                     |
|--------------|---------------------------------|--------------------------|---------------------|---------------------|----------------------------------|--------------------------|---------------------|----------------------|------------------------------------|--------------------------|---------------------|---------------------|
|              | Aesthetic Score $\uparrow$      | Imaging Score $\uparrow$ | CLIP-cap $\uparrow$ | Face-ref $\uparrow$ | Aesthetic Score $\uparrow$       | Imaging Score $\uparrow$ | CLIP-cap $\uparrow$ | Style-ref $\uparrow$ | Aesthetic Score $\uparrow$         | Imaging Score $\uparrow$ | CLIP-cap $\uparrow$ | DINO-ref $\uparrow$ |
| ACE          | 5.352                           | 54.953                   | 0.265               | 0.329               | 5.312                            | 58.960                   | 0.116               | <b>0.802</b>         | 5.228                              | 55.748                   | 0.249               | <b>0.878</b>        |
| OmniGen      | <b>5.790</b>                    | <b>72.667</b>            | <b>0.270</b>        | 0.573               | <b>5.785</b>                     | <b>70.827</b>            | <b>0.215</b>        | 0.432                | <b>5.821</b>                       | 71.355                   | <b>0.266</b>        | 0.753               |
| IP-Adapter   | 5.055                           | 64.239                   | 0.254               | <b>0.633</b>        | 5.773                            | 69.629                   | 0.144               | 0.749                | 5.726                              | 70.329                   | 0.242               | 0.841               |
| ACE++        | 5.508                           | 67.900                   | 0.261               | 0.506               | -                                | -                        | -                   | -                    | 5.198                              | 62.751                   | 0.238               | 0.852               |
| OminiControl | -                               | -                        | -                   | -                   | -                                | -                        | -                   | -                    | 5.651                              | <b>72.273</b>            | 0.264               | 0.783               |

Table 7. Metrics on Global Editing Tasks (Tasks 5-16).

| Models          | Task 5: Color Editing      |                          |                     |                    |                     |                     | Task 6: Motion Editing     |                          |                     |                    |                     |                     | Task 7: Face Editing       |                          |                     |                    |                     |                     |
|-----------------|----------------------------|--------------------------|---------------------|--------------------|---------------------|---------------------|----------------------------|--------------------------|---------------------|--------------------|---------------------|---------------------|----------------------------|--------------------------|---------------------|--------------------|---------------------|---------------------|
|                 | Aesthetic Score $\uparrow$ | Imaging Score $\uparrow$ | CLIP-cap $\uparrow$ | VLLM-QA $\uparrow$ | CLIP-src $\uparrow$ | L1-src $\downarrow$ | Aesthetic Score $\uparrow$ | Imaging Score $\uparrow$ | CLIP-cap $\uparrow$ | VLLM-QA $\uparrow$ | CLIP-src $\uparrow$ | L1-src $\downarrow$ | Aesthetic Score $\uparrow$ | Imaging Score $\uparrow$ | CLIP-cap $\uparrow$ | VLLM-QA $\uparrow$ | CLIP-src $\uparrow$ | L1-src $\downarrow$ |
| ACE             | <b>5.244</b>               | 55.219                   | <b>0.285</b>        | <b>0.896</b>       | <b>0.919</b>        | <b>0.080</b>        | <b>5.146</b>               | 57.679                   | <b>0.278</b>        | <b>0.354</b>       | <b>0.946</b>        | <b>0.033</b>        | 4.798                      | 56.851                   | <b>0.268</b>        | <b>0.796</b>       | <b>0.899</b>        | <b>0.046</b>        |
| OmniGen         | 4.918                      | <b>63.562</b>            | 0.277               | 0.789              | 0.880               | 0.119               | 4.927                      | <b>61.038</b>            | 0.262               | 0.329              | 0.870               | 0.106               | 4.735                      | <b>63.584</b>            | 0.247               | 0.636              | 0.818               | 0.095               |
| InstructPix2Pix | 4.990                      | 53.124                   | 0.267               | 0.452              | 0.828               | 0.217               | 4.796                      | 57.453                   | 0.211               | 0.081              | 0.719               | 0.134               | <b>4.920</b>               | 57.941                   | 0.192               | 0.364              | 0.669               | 0.151               |
| MagicBrush      | 4.826                      | 51.677                   | 0.267               | 0.604              | 0.854               | 0.094               | 4.620                      | 53.121                   | 0.254               | 0.267              | 0.826               | 0.081               | 4.636                      | 55.833                   | 0.258               | 0.660              | 0.836               | 0.054               |
| UltraEdit       | 5.136                      | 52.398                   | 0.274               | 0.485              | 0.864               | 0.098               | 4.970                      | 55.514                   | 0.266               | 0.199              | 0.871               | 0.059               | 4.774                      | 57.159                   | 0.247               | 0.655              | 0.786               | 0.057               |
| Models          | Task 8: Texture Editing    |                          |                     |                    |                     |                     | Task 9: Style Editing      |                          |                     |                    |                     |                     | Task 10: Scene Editing     |                          |                     |                    |                     |                     |
|                 | Aesthetic Score $\uparrow$ | Imaging Score $\uparrow$ | CLIP-cap $\uparrow$ | VLLM-QA $\uparrow$ | CLIP-src $\uparrow$ | L1-src $\downarrow$ | Aesthetic Score $\uparrow$ | Imaging Score $\uparrow$ | CLIP-cap $\uparrow$ | VLLM-QA $\uparrow$ | CLIP-src $\uparrow$ | L1-src $\downarrow$ | Aesthetic Score $\uparrow$ | Imaging Score $\uparrow$ | CLIP-cap $\uparrow$ | VLLM-QA $\uparrow$ | CLIP-src $\uparrow$ | L1-src $\downarrow$ |
| ACE             | <b>5.408</b>               | 57.106                   | <b>0.276</b>        | 0.605              | <b>0.918</b>        | <b>0.060</b>        | <b>4.967</b>               | 51.081                   | <b>0.258</b>        | 0.470              | <b>0.781</b>        | 0.158               | 5.076                      | 47.345                   | <b>0.253</b>        | 0.392              | <b>0.902</b>        | <b>0.075</b>        |
| OmniGen         | 5.151                      | <b>64.069</b>            | 0.257               | 0.558              | 0.819               | 0.156               | 4.935                      | <b>60.567</b>            | 0.250               | <b>0.478</b>       | 0.763               | 0.183               | <b>5.109</b>               | <b>55.674</b>            | 0.246               | 0.414              | 0.806               | 0.169               |
| InstructPix2Pix | 4.847                      | 59.220                   | 0.240               | 0.422              | 0.703               | 0.193               | 4.630                      | 48.674                   | 0.228               | 0.416              | 0.627               | 0.218               | 5.048                      | 45.324                   | 0.224               | 0.381              | 0.657               | 0.219               |
| MagicBrush      | 4.720                      | 52.909                   | 0.245               | 0.463              | 0.796               | 0.122               | 4.227                      | 46.647                   | 0.184               | 0.140              | 0.600               | 0.249               | 4.592                      | 44.262                   | 0.239               | <b>0.464</b>       | 0.725               | 0.189               |
| UltraEdit       | 5.148                      | 54.875                   | 0.270               | <b>0.714</b>       | 0.821               | 0.093               | 4.697                      | 49.067                   | 0.246               | 0.414              | 0.726               | <b>0.093</b>        | 5.023                      | 44.961                   | 0.255               | 0.453              | 0.764               | 0.098               |
| Models          | Task 11: Subject Addition  |                          |                     |                    |                     |                     | Task 12: Subject Removal   |                          |                     |                    |                     |                     | Task 13: Subject Change    |                          |                     |                    |                     |                     |
|                 | Aesthetic Score $\uparrow$ | Imaging Score $\uparrow$ | CLIP-cap $\uparrow$ | VLLM-QA $\uparrow$ | CLIP-src $\uparrow$ | L1-src $\downarrow$ | Aesthetic Score $\uparrow$ | Imaging Score $\uparrow$ | CLIP-cap $\uparrow$ | VLLM-QA $\uparrow$ | CLIP-src $\uparrow$ | L1-src $\downarrow$ | Aesthetic Score $\uparrow$ | Imaging Score $\uparrow$ | CLIP-cap $\uparrow$ | VLLM-QA $\uparrow$ | CLIP-src $\uparrow$ | L1-src $\downarrow$ |
| ACE             | 4.920                      | 50.514                   | <b>0.274</b>        | <b>0.619</b>       | <b>0.888</b>        | <b>0.045</b>        | 4.877                      | 45.559                   | <b>0.253</b>        | <b>0.834</b>       | 0.855               | <b>0.053</b>        | <b>5.018</b>               | 52.386                   | <b>0.274</b>        | 0.500              | <b>0.881</b>        | <b>0.070</b>        |
| OmniGen         | <b>4.987</b>               | <b>58.151</b>            | 0.266               | 0.611              | 0.877               | 0.077               | 4.884                      | <b>54.001</b>            | 0.231               | 0.611              | 0.830               | 0.107               | 4.997                      | <b>59.282</b>            | 0.262               | 0.460              | 0.812               | 0.115               |
| InstructPix2Pix | 4.884                      | 52.320                   | 0.205               | 0.234              | 0.703               | 0.144               | 4.827                      | 48.625                   | 0.170               | 0.119              | 0.711               | 0.141               | 4.746                      | 53.884                   | 0.229               | 0.360              | 0.691               | 0.179               |
| MagicBrush      | 4.656                      | 46.127                   | 0.272               | 0.594              | 0.866               | 0.061               | 4.672                      | 45.197                   | 0.231               | 0.322              | 0.864               | 0.069               | 4.291                      | 48.950                   | 0.257               | 0.500              | 0.756               | 0.123               |
| UltraEdit       | 4.932                      | 47.651                   | 0.259               | 0.537              | 0.830               | 0.064               | <b>4.974</b>               | 47.308                   | 0.223               | 0.256              | <b>0.873</b>        | 0.056               | 4.868                      | 51.984                   | 0.269               | <b>0.540</b>       | 0.788               | 0.082               |
| Models          | Task 14: Text Render       |                          |                     |                    |                     |                     | Task 15: Text Removal      |                          |                     |                    |                     |                     | Task 16: Composite Editing |                          |                     |                    |                     |                     |
|                 | Aesthetic Score $\uparrow$ | Imaging Score $\uparrow$ | CLIP-cap $\uparrow$ | VLLM-QA $\uparrow$ | CLIP-src $\uparrow$ | L1-src $\downarrow$ | Aesthetic Score $\uparrow$ | Imaging Score $\uparrow$ | CLIP-cap $\uparrow$ | VLLM-QA $\uparrow$ | CLIP-src $\uparrow$ | L1-src $\downarrow$ | Aesthetic Score $\uparrow$ | Imaging Score $\uparrow$ | CLIP-cap $\uparrow$ | VLLM-QA $\uparrow$ | CLIP-src $\uparrow$ | L1-src $\downarrow$ |
| ACE             | 3.981                      | 51.104                   | <b>0.263</b>        | 0.517              | 0.800               | <b>0.052</b>        | <b>4.842</b>               | 49.714                   | <b>0.270</b>        | <b>0.754</b>       | <b>0.883</b>        | <b>0.037</b>        | <b>5.475</b>               | 49.984                   | 0.270               | 0.420              | <b>0.797</b>        | 0.194               |
| OmniGen         | 4.351                      | <b>57.420</b>            | <b>0.263</b>        | <b>0.596</b>       | 0.815               | 0.075               | 4.500                      | <b>57.211</b>            | 0.223               | 0.330              | 0.767               | 0.125               | 5.259                      | <b>62.885</b>            | 0.272               | <b>0.567</b>       | 0.753               | 0.229               |
| InstructPix2Pix | <b>4.712</b>               | 51.201                   | 0.213               | 0.010              | 0.718               | 0.187               | 4.400                      | 44.069                   | 0.194               | 0.147              | 0.655               | 0.163               | 4.827                      | 50.006                   | 0.258               | 0.280              | 0.698               | <b>0.237</b>        |
| MagicBrush      | 4.458                      | 45.903                   | 0.261               | 0.099              | <b>0.845</b>        | 0.088               | 4.359                      | 44.484                   | 0.260               | 0.529              | 0.838               | 0.063               | 4.665                      | 47.646                   | 0.245               | 0.070              | 0.732               | 0.185               |
| UltraEdit       | 4.465                      | 46.965                   | 0.262               | 0.187              | 0.813               | 0.059               | 4.640                      | 47.908                   | 0.255               | 0.246              | 0.861               | 0.044               | 5.180                      | 48.372                   | <b>0.274</b>        | 0.395              | 0.731               | 0.147               |

Table 8. Metrics on Local Editing Tasks (Tasks 17-22).

| Models    | Task 17: Inpainting            |                          |                     |                    |                     |                     | Task 18: Outpainting       |                          |                     |                    |                     |                     | Task 19: Local Subject Addition |                          |                     |                    |                     |                     |
|-----------|--------------------------------|--------------------------|---------------------|--------------------|---------------------|---------------------|----------------------------|--------------------------|---------------------|--------------------|---------------------|---------------------|---------------------------------|--------------------------|---------------------|--------------------|---------------------|---------------------|
|           | Aesthetic Score $\uparrow$     | Imaging Score $\uparrow$ | CLIP-cap $\uparrow$ | VLLM-QA $\uparrow$ | CLIP-src $\uparrow$ | L1-src $\downarrow$ | Aesthetic Score $\uparrow$ | Imaging Score $\uparrow$ | CLIP-cap $\uparrow$ | VLLM-QA $\uparrow$ | CLIP-src $\uparrow$ | L1-src $\downarrow$ | Aesthetic Score $\uparrow$      | Imaging Score $\uparrow$ | CLIP-cap $\uparrow$ | VLLM-QA $\uparrow$ | CLIP-src $\uparrow$ | L1-src $\downarrow$ |
| ACE       | 4.878                          | 51.793                   | 0.269               | 0.833              | 0.785               | 0.024               | 5.514                      | 50.403                   | 0.287               | 0.376              | 0.891               | 0.017               | 4.965                           | 51.704                   | 0.272               | 0.555              | 0.897               | 0.029               |
| OmniGen   | 4.545                          | 59.264                   | 0.238               | 0.524              | 0.734               | 0.108               | 5.442                      | <b>65.758</b>            | 0.265               | 0.326              | 0.802               | 0.114               | 4.584                           | 58.911                   | 0.249               | 0.479              | 0.814               | 0.066               |
| ACE++     | <b>5.064</b>                   | <b>61.661</b>            | <b>0.272</b>        | <b>0.910</b>       | 0.776               | <b>0.016</b>        | <b>5.644</b>               | 64.156                   | <b>0.289</b>        | <b>0.531</b>       | 0.908               | <b>0.010</b>        | <b>5.014</b>                    | <b>62.083</b>            | 0.268               | <b>0.785</b>       | 0.894               | <b>0.018</b>        |
| UltraEdit | 3.817                          | 46.284                   | 0.250               | 0.180              | <b>0.952</b>        | 0.019               | 4.498                      | 43.968                   | 0.274               | 0.220              | <b>0.945</b>        | 0.018               | 4.881                           | 47.855                   | <b>0.275</b>        | 0.555              | <b>0.909</b>        | 0.021               |
| Models    | Task 20: Local Subject Removal |                          |                     |                    |                     |                     | Task 21: Local Text Render |                          |                     |                    |                     |                     | Task 22: Local Text Removal     |                          |                     |                    |                     |                     |
|           | Aesthetic Score $\uparrow$     | Imaging Score $\uparrow$ | CLIP-cap $\uparrow$ | VLLM-QA $\uparrow$ | CLIP-src $\uparrow$ | L1-src $\downarrow$ | Aesthetic Score $\uparrow$ | Imaging Score $\uparrow$ | CLIP-cap $\uparrow$ | VLLM-QA $\uparrow$ | CLIP-src $\uparrow$ | L1-src $\downarrow$ | Aesthetic Score $\uparrow$      | Imaging Score $\uparrow$ | CLIP-cap $\uparrow$ | VLLM-QA $\uparrow$ | CLIP-src $\uparrow$ | L1-src $\downarrow$ |
| ACE       | 4.996                          | 47.011                   | <b>0.258</b>        | <b>0.757</b>       | 0.852               | 0.024               | 4.275                      | 43.159                   | 0.276               | <b>0.791</b>       | 0.860               | 0.016               | <b>4.896</b>                    | 49.766                   | <b>0.273</b>        | <b>0.801</b>       | 0.888               | 0.033               |
| OmniGen   | 4.792                          | 54.320                   | 0.238               | 0.658              | 0.787               | 0.061               | 4.015                      | 42.527                   | 0.261               | 0.380              | 0.815               | 0.066               | 4.487                           | 56.398                   | 0.246               | 0.674              | 0.793               | 0.097               |
| ACE++     | <b>5.061</b>                   | <b>61.614</b>            | 0.229               | 0.312              | <b>0.901</b>        | <b>0.017</b>        | 4.231                      | <b>43.276</b>            | <b>0.277</b>        | 0.834              | 0.899               | <b>0.012</b>        | 4.694                           | <b>59.636</b>            | 0.260               | 0.704              | 0.905               | <b>0.017</b>        |
| UltraEdit | 4.858                          | 48.748                   | 0.226               | 0.287              | 0.888               | 0.018               | <b>4.506</b>               | 38.887                   | <b>0.277</b>        | 0.098              | <b>0.946</b>        | 0.014               | 4.665                           | 47.294                   | 0.264               | 0.714              | <b>0.910</b>        | 0.023               |

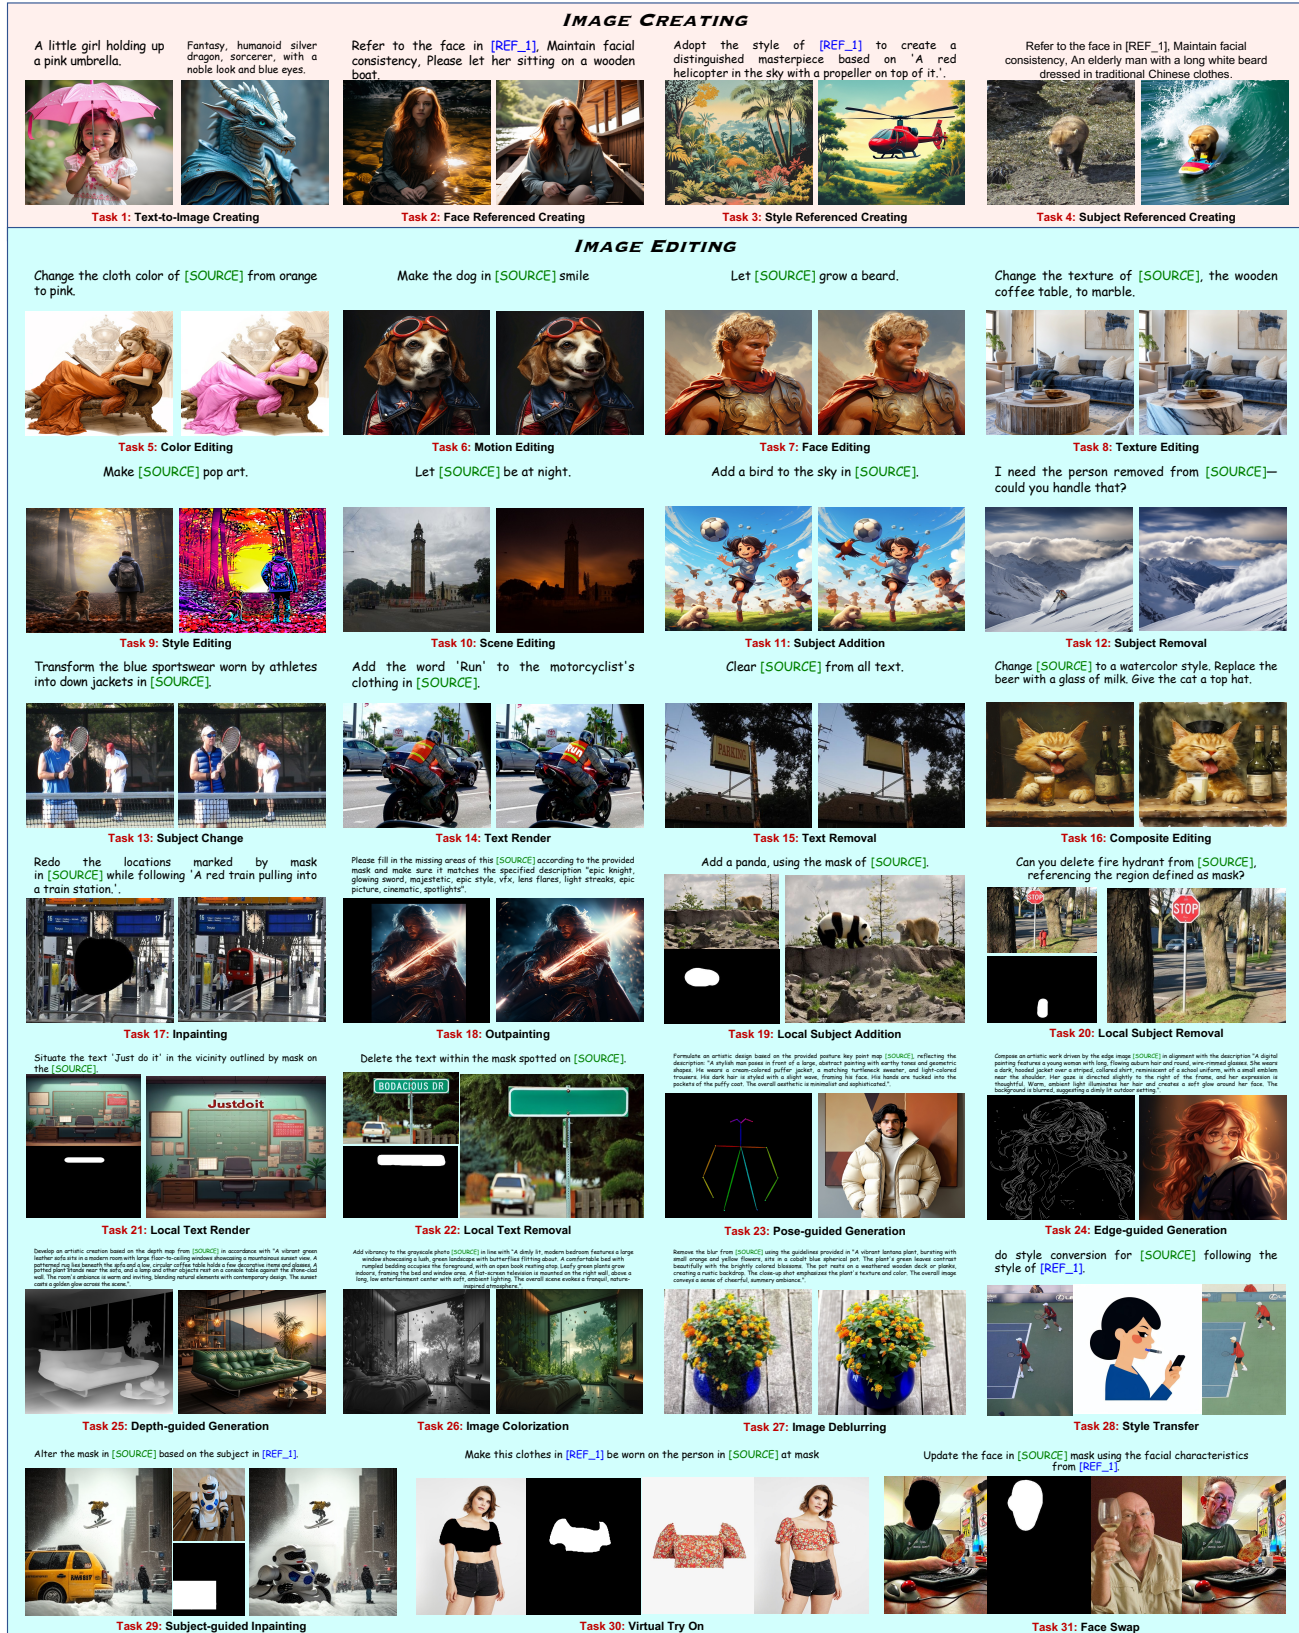

Figure 7. Examples of 31 fine-grained evaluation tasks in our ICE-Bench.
